# Supplementary material for: Chlorophyll Oxidative Metabolism During the Phototrophic and Heterotrophic Growth of Scenedesmus obliquus
Source: PubMed Central journal article supplement (PMC6943719; doi:10.3390/antiox8120600), 2019-11-29
Supplement: antioxidants-08-00600-s001.pdf [file antioxidants-08-00600-s001.pdf]

**Table S1.** Photosynthetic pigments identified by HPLC-PDA-ESI/APCI(+)-Q-TOF in the study.

| <b>Pigment</b>                                        | <b>UV-Vis Maxima<br/>(nm)</b> | <b>[M + H]<sup>+</sup><br/>(m/z)</b> | <b>Elemental<br/>Composition</b>                                |
|-------------------------------------------------------|-------------------------------|--------------------------------------|-----------------------------------------------------------------|
| chlorophyllide <i>a</i>                               | 430, 666                      | 615.2450                             | C <sub>35</sub> H <sub>34</sub> MgN <sub>4</sub> O <sub>5</sub> |
| pheophorbide <i>a</i>                                 | 410, 665                      | 593.2761                             | C <sub>35</sub> H <sub>36</sub> N <sub>4</sub> O <sub>5</sub>   |
| pheophorbide <i>a'</i>                                | 409, 666                      | 593.2758                             | C <sub>35</sub> H <sub>36</sub> N <sub>4</sub> O <sub>5</sub>   |
| 13 <sup>2</sup> -hydroxy-pheophorbide <i>a</i>        | 408, 666                      | 609.2705                             | C <sub>35</sub> H <sub>36</sub> N <sub>4</sub> O <sub>6</sub>   |
| <i>cis</i> -violaxanthin                              | 412, 434, 463                 | 599.4116 <sup>a</sup>                | C <sub>40</sub> H <sub>56</sub> O <sub>4</sub>                  |
| <i>cis</i> -neoxanthin                                | 412, 434, 462                 | 599.4113 <sup>a</sup>                | C <sub>40</sub> H <sub>56</sub> O <sub>4</sub>                  |
| <i>cis</i> -luteoxanthin                              | 398, 421, 448                 | 599.4114 <sup>a</sup>                | C <sub>40</sub> H <sub>56</sub> O <sub>4</sub>                  |
| <i>all-trans</i> -lutein                              | 421, 444, 474                 | 551.4245 <sup>b</sup>                | C <sub>40</sub> H <sub>56</sub> O <sub>2</sub>                  |
| <i>cis</i> -lutein                                    | 342, 421, 444, 474            | 551.4248 <sup>b</sup>                | C <sub>40</sub> H <sub>56</sub> O <sub>2</sub>                  |
| 15 <sup>2</sup> -hydroxy-lactone-chlorophyll <i>b</i> | 454, 634                      | 939.5115                             | C <sub>55</sub> H <sub>70</sub> MgN <sub>4</sub> O <sub>8</sub> |
| 13 <sup>2</sup> -hydroxy-chlorophyll <i>b</i>         | 462, 650                      | 923.5169                             | C <sub>55</sub> H <sub>70</sub> MgN <sub>4</sub> O <sub>7</sub> |
| chlorophyll <i>b</i>                                  | 466, 650                      | 907.5222                             | C <sub>55</sub> H <sub>70</sub> MgN <sub>4</sub> O <sub>6</sub> |
| chlorophyll <i>b'</i>                                 | 466, 650                      | 907.5220                             | C <sub>55</sub> H <sub>70</sub> MgN <sub>4</sub> O <sub>6</sub> |
| 13 <sup>2</sup> -hydroxy-chlorophyll <i>b'</i>        | 462, 650                      | 923.5164                             | C <sub>55</sub> H <sub>70</sub> MgN <sub>4</sub> O <sub>7</sub> |
| 13 <sup>2</sup> -hydroxy-chlorophyll <i>a</i>         | 432, 666                      | 909.5380                             | C <sub>55</sub> H <sub>72</sub> MgN <sub>4</sub> O <sub>6</sub> |
| chlorophyll <i>a</i>                                  | 432, 666                      | 893.5429                             | C <sub>55</sub> H <sub>72</sub> MgN <sub>4</sub> O <sub>5</sub> |
| chlorophyll <i>a'</i>                                 | 432, 666                      | 893.5425                             | C <sub>55</sub> H <sub>72</sub> MgN <sub>4</sub> O <sub>5</sub> |
| pheophytin <i>a</i>                                   | 407, 665                      | 871.5730                             | C <sub>55</sub> H <sub>74</sub> N <sub>4</sub> O <sub>5</sub>   |
| pheophytin <i>a'</i>                                  | 407, 665                      | 871.5731                             | C <sub>55</sub> H <sub>74</sub> N <sub>4</sub> O <sub>5</sub>   |
| <i>all-trans</i> -β-carotene                          | 424, 451, 477                 | 537.4435                             | C <sub>40</sub> H <sub>56</sub>                                 |
| 9- <i>cis</i> -β-carotene                             | 340, 420, 446, 472            | 537.4445                             | C <sub>40</sub> H <sub>56</sub>                                 |

<sup>a</sup>Protonated ion arising from the M<sup>+</sup> radical ion. <sup>b</sup>Product ion corresponding to the loss of water from the protonated molecular ion.
